# Supplementary material
Source: publisher figshare collection journal article supplement (https://sage.figshare.com/ndownloader/files/21001428)
Supplement: Supplementary file 1 [file 21001428]

## APPENDIXES

### A. Tables 1 and 2. Effect of Jackson's 1984 Presidential Campaign on African American Political Behavior – Predicted Probabilities for All Significant Variables

|                                            | <b>Donated Money</b> | <b>Vol. Voter Registration</b> | <b>Attended Meeting</b> | <b>Proselytized</b> |
|--------------------------------------------|----------------------|--------------------------------|-------------------------|---------------------|
| Favored Jackson                            | 0.09**               |                                | 0.09**                  | 0.12**              |
| Reagan Approval                            |                      |                                |                         | -0.17**             |
| Black Linked Fate                          | 0.12**               |                                |                         |                     |
| Black Organization (member)                | 0.14***              |                                | 0.17***                 | 0.14***             |
| Political church (member)                  | 0.25***              | 0.17***                        | 0.29***                 | 0.16***             |
| Female                                     |                      |                                |                         | -0.09*              |
| Age                                        | 0.24**               | -0.19**                        |                         |                     |
| Income                                     | 0.13**               |                                |                         |                     |
| Education                                  | 0.21***              |                                |                         |                     |
| Internal Efficacy                          |                      |                                | 0.08*                   |                     |
| Source: 1984 National Black Election Study |                      |                                |                         |                     |
| * $p < .10$ ** $p < .05$ *** $p < .01$     |                      |                                |                         |                     |

### B. Table 2. Effect of Jackson's 1984 Campaign on Political Behavior for African American Women – Full Results

|                                       | <b>Donated Money</b>     | <b>Vol. Voter Registration</b> | <b>Attended Meeting</b> | <b>Proselytized</b>        |
|---------------------------------------|--------------------------|--------------------------------|-------------------------|----------------------------|
| Favored Jackson                       | <b>0.678*</b><br>(0.349) | 0.418<br>(0.325)               | 0.336<br>(0.332)        | <b>0.781***</b><br>(0.286) |
| Reagan Disapproval                    | 0.035<br>(0.205)         | -0.031<br>(0.189)              | 0.263<br>(0.176)        | -0.225<br>(0.159)          |
| Black Linked Fate                     | 0.172<br>(0.149)         | 0.198<br>(0.138)               | 0.020<br>(0.135)        | 0.054<br>(0.111)           |
| Registered to vote for the first time | -0.082<br>(0.661)        | -0.579<br>(0.531)              | -0.565<br>(0.616)       | -0.105<br>(0.436)          |
| Black organization (member)           | 0.988***<br>(0.349)      | -0.005<br>(0.370)              | 0.901***<br>(0.333)     | 0.631**<br>(0.309)         |
| Political church (member)             | 1.597***<br>(0.324)      | 0.982***<br>(0.307)            | 1.321***<br>(0.295)     | 0.590**<br>(0.270)         |
| Age                                   | 0.014<br>(0.012)         | -0.030**<br>(0.012)            | -0.001<br>(0.011)       | 0.009<br>(0.009)           |
| Ideology                              | 0.022<br>(0.080)         | -0.015<br>(0.073)              | 0.033<br>(0.073)        | 0.004<br>(0.062)           |
| Income                                | 0.077<br>(0.053)         | 0.007<br>(0.052)               | 0.031<br>(0.050)        | 0.091**<br>(0.043)         |
| Education                             | 0.249*<br>(0.133)        | -0.157<br>(0.139)              | 0.174<br>(0.125)        | 0.023<br>(0.106)           |
| Internal Efficacy                     | 0.449<br>(0.344)         | 0.625*<br>(0.322)              | 0.390<br>(0.311)        | -0.018<br>(0.269)          |
| South                                 | -0.091                   | -0.023                         | -0.055                  | -0.152                     |

|                                            |                      |                   |                      |                     |
|--------------------------------------------|----------------------|-------------------|----------------------|---------------------|
|                                            | (0.323)              | (0.298)           | (0.295)              | (0.248)             |
| Constant                                   | -4.635***<br>(0.901) | -0.835<br>(0.759) | -2.946***<br>(0.766) | -1.595**<br>(0.625) |
| N                                          | 318                  | 319               | 318                  | 319                 |
| Log likelihood                             | -130.831             | -148.589          | -151.193             | -196.502            |
| Pseudo R2                                  | 0.257                | 0.086             | 0.167                | 0.104               |
| Source: 1984 National Black Election Study |                      |                   |                      |                     |
| * $p < .10$ ; ** $p < .05$ ; *** $p < .01$ |                      |                   |                      |                     |

**C. Table 2. Effect of Jackson's 1984 Campaign on Political Behavior for African American Women. Predicted Probabilities for All Significant Variables**

|                                                                                      | Donated Money | Vol. Voter Registration | Attended Meeting | Proselytized |
|--------------------------------------------------------------------------------------|---------------|-------------------------|------------------|--------------|
| Favored Jackson                                                                      | 0.11*         |                         |                  | 0.19***      |
| Black Organization (member)                                                          | 0.16***       |                         | 0.17***          | 0.15**       |
| Political church (member)                                                            | 0.28***       | 0.16***                 | 0.26***          | 0.15**       |
| Income                                                                               |               |                         |                  | 0.22**       |
| Education                                                                            | 0.17*         |                         |                  |              |
| Internal Efficacy                                                                    |               | 0.09*                   |                  |              |
| Source: 1984 National Black Election Study. See appendix B (above) for full results. |               |                         |                  |              |
| * $p < .10$ ** $p < .05$ *** $p < .01$                                               |               |                         |                  |              |

**D. Table 2. Effect of Jackson's 1984 Campaign on Political Behavior for African American Men – Full Results**

|                                       | Donated Money      | Vol. Voter Registration | Attended Meeting         | Proselytized       |
|---------------------------------------|--------------------|-------------------------|--------------------------|--------------------|
| Favored Jackson                       | 0.314<br>(0.408)   | -0.017<br>(0.396)       | <b>0.760*</b><br>(0.388) | -0.111<br>(0.344)  |
| Reagan Approval                       | -0.063<br>(0.204)  | -0.153<br>(0.188)       | -0.124<br>(0.183)        | -0.268*<br>(0.158) |
| Black Linked Fate                     | 0.488**<br>(0.201) | 0.003<br>(0.165)        | -0.013<br>(0.167)        | 0.214<br>(0.142)   |
| Registered to vote for the first time | 0.220<br>(0.616)   | -0.128<br>(0.550)       | -0.071<br>(0.583)        | -0.045<br>(0.454)  |
| Black organization (member)           | 0.711*<br>(0.396)  | 0.741*<br>(0.385)       | 0.895**<br>(0.373)       | 0.507<br>(0.351)   |
| Political church (member)             | 1.037**<br>(0.414) | 0.732*<br>(0.380)       | 1.604***<br>(0.388)      | 0.730*<br>(0.374)  |
| Age                                   | 0.025*<br>(0.014)  | -0.005<br>(0.012)       | 0.010<br>(0.012)         | 0.002<br>(0.011)   |
| Ideology                              | -0.098             | 0.083                   | -0.048                   | -0.116*            |

|                                                                                           |                      |                    |                      |                     |
|-------------------------------------------------------------------------------------------|----------------------|--------------------|----------------------|---------------------|
|                                                                                           | (0.084)              | (0.077)            | (0.077)              | (0.068)             |
| Income                                                                                    | 0.100<br>(0.064)     | 0.069<br>(0.059)   | 0.043<br>(0.058)     | -0.123**<br>(0.052) |
| Education                                                                                 | 0.350**<br>(0.139)   | -0.139<br>(0.140)  | 0.016<br>(0.133)     | 0.157<br>(0.117)    |
| Internal Efficacy                                                                         | -0.045<br>(0.391)    | 0.006<br>(0.359)   | 0.483<br>(0.360)     | 0.285<br>(0.316)    |
| South                                                                                     | 0.331<br>(0.365)     | 0.244<br>(0.338)   | -0.399<br>(0.342)    | -0.371<br>(0.297)   |
| Constant                                                                                  | -5.286***<br>(1.112) | -1.738*<br>(0.895) | -2.388***<br>(0.917) | 0.226<br>(0.781)    |
| N                                                                                         | 218                  | 219                | 219                  | 218                 |
| Log likelihood                                                                            | -97.356              | -113.548           | -110.576             | -135.978            |
| Pseudo R2                                                                                 | 0.216                | 0.063              | 0.171                | 0.100               |
| Source: 1984 National Black Election Study.<br>* $p < .10$ ; ** $p < .05$ ; *** $p < .01$ |                      |                    |                      |                     |

**E. Table 2. Effect of Jackson's 1984 Campaign on Political Behavior for African American Men. Predicted Probabilities for All Significant Variables**

|                                                                                                                                | Donated Money | Vol. Voter Registration | Attended Meeting | Proselytized |
|--------------------------------------------------------------------------------------------------------------------------------|---------------|-------------------------|------------------|--------------|
| Favored Jackson                                                                                                                |               |                         | 0.16*            |              |
| Reagan Approval                                                                                                                |               |                         |                  | -0.19*       |
| Black Linked Fate                                                                                                              | 0.20**        |                         |                  |              |
| Black Organization (member)                                                                                                    | 0.13*         | 0.14*                   | 0.18**           |              |
| Political church (member)                                                                                                      | 0.19**        | 0.14*                   | 0.35***          | 0.17*        |
| Age                                                                                                                            | 0.32*         |                         |                  |              |
| Ideology                                                                                                                       |               |                         |                  | -0.17*       |
| Income                                                                                                                         |               |                         |                  | 0.18*        |
| Education                                                                                                                      | 0.27**        |                         |                  |              |
| Source: 1984 National Black Election Study. See appendix D (above) for full results.<br>* $p < .10$ ** $p < .05$ *** $p < .01$ |               |                         |                  |              |

**F. Effect of Jackson's 1988 Campaign on African American Political Behavior**

|                             | Donated Money      | Vol. Voter Registration | Attended Meeting   | Proselytized       |
|-----------------------------|--------------------|-------------------------|--------------------|--------------------|
| Favored Jackson             | 0.432<br>(0.619)   | 0.298<br>(0.665)        | -0.214<br>(0.586)  | -0.450<br>(0.542)  |
| Reagan Approval             | -0.518*<br>(0.296) | 0.232<br>(0.261)        | -0.215<br>(0.275)  | -0.355<br>(0.247)  |
| Black Linked Fate           | 0.001<br>(0.315)   | -0.084<br>(0.349)       | -0.009<br>(0.321)  | 0.087<br>(0.277)   |
| Black Organization (member) | 1.130**<br>(0.467) | 0.119<br>(0.536)        | 1.224**<br>(0.480) | 0.917**<br>(0.444) |

|                                            |                     |                   |                     |                    |
|--------------------------------------------|---------------------|-------------------|---------------------|--------------------|
| Political church<br>(member)               | 1.309***<br>(0.470) | 0.542<br>(0.525)  | 1.547***<br>(0.473) | 0.825*<br>(0.444)  |
| Female                                     | -0.693<br>(0.507)   | -0.705<br>(0.534) | -0.289<br>(0.503)   | -0.118<br>(0.448)  |
| Age                                        | -0.011<br>(0.019)   | -0.009<br>(0.020) | 0.005<br>(0.018)    | 0.021<br>(0.016)   |
| Ideology                                   | -0.089<br>(0.121)   | 0.110<br>(0.124)  | -0.116<br>(0.119)   | -0.036<br>(0.106)  |
| Income                                     | 0.025<br>(0.112)    | -0.090<br>(0.107) | -0.115<br>(0.110)   | -0.183*<br>(0.094) |
| Education                                  | 0.204<br>(0.173)    | 0.101<br>(0.193)  | 0.126<br>(0.174)    | 0.038<br>(0.157)   |
| Internal Efficacy                          | -0.557<br>(0.530)   | -0.724<br>(0.608) | -0.828<br>(0.548)   | -0.787*<br>(0.471) |
| South                                      | 0.128<br>(0.459)    | -0.716<br>(0.500) | -0.094<br>(0.462)   | 0.206<br>(0.412)   |
| Constant                                   | -1.632<br>(1.821)   | -0.570<br>(1.877) | -0.314<br>(1.785)   | 1.093<br>(1.600)   |
| N                                          | 130                 | 130               | 130                 | 130                |
| Log likelihood                             | -66.846             | -60.040           | -66.924             | -79.053            |
| Pseudo R2                                  | 0.20                | 0.077             | 0.196               | 0.119              |
| Source: 1988 National Black Election Study |                     |                   |                     |                    |
| * $p < .10$ ** $p < .05$ *** $p < .01$     |                     |                   |                     |                    |

**G. Table 4. Political Behavior of African Americans Voting for Obama in the 2008 Presidential Primary, Compared to other Racial, Ethnic, and Gender Groups – Full Results**

| Variables                                                     | Donated Money             | Sign/Button/Sticker                | Attended Rally                 | Political Talk            |
|---------------------------------------------------------------|---------------------------|------------------------------------|--------------------------------|---------------------------|
| African American <u>Women</u> Voting for Obama in the Primary | <b>1.279**</b><br>(0.622) | <b>0.901**</b><br>(0.397)          | <b>1.518**</b><br>(0.602)      | <b>0.956**</b><br>(0.387) |
| African American <u>Men</u> Voting for Obama in the Primary   | 0.776<br>(0.671)          | 0.236<br>(0.450)                   | 1.016<br>(0.653)               | 0.408<br>(0.435)          |
| Age                                                           | 0.005<br>(0.010)          | 36.805*** <sup>1</sup><br>(12.670) | 0.003<br>(0.010)               | -0.008<br>(0.006)         |
| Female                                                        | -0.008<br>(0.336)         | -0.191<br>(0.234)                  | -0.268<br>(0.333)              | -0.107<br>(0.200)         |
| African American                                              | -0.287<br>(0.463)         | 0.556**<br>(0.264)                 | -0.782*<br>(0.458)             | -0.509**<br>(0.235)       |
| South                                                         | -0.662**<br>(0.332)       | -0.336<br>(0.222)                  | -0.608*<br>(0.325)             | -0.203<br>(0.190)         |
| Income                                                        | 0.038<br>(0.028)          | 0.022<br>(0.019)                   | 0.011<br>(0.025)               | -0.003<br>(0.016)         |
| Education                                                     | 0.225**<br>(0.112)        | 0.058<br>(0.082)                   | 3.603* <sup>2</sup><br>(2.068) | 0.151**<br>(0.072)        |
| Religious Service Attendance                                  | -0.037<br>(0.084)         | 0.031<br>(0.056)                   | 1.61e-77***<br>(4.29E-78)      | 0.116**<br>(0.050)        |
| Ideology                                                      | -0.307*<br>(0.182)        | -0.117<br>(0.119)                  | -0.351*<br>(0.172)             | -0.288***<br>(0.102)      |
| Internal Efficacy                                             | -0.220<br>(0.141)         | -0.083<br>(0.106)                  | -0.253*<br>(0.136)             | -0.078<br>(0.096)         |
| External Efficacy                                             | -0.105<br>(0.132)         | -0.132<br>(0.090)                  | 0.090<br>(0.131)               | 0.008<br>(0.078)          |
| Bush Disapproval                                              | 1.072*<br>(0.571)         | 0.968***<br>(0.301)                | 2.143**<br>(0.988)             | 0.717***<br>(0.189)       |
| Habitual Voter                                                | 1.074**<br>(0.477)        | 0.689**<br>(0.278)                 | 0.793*<br>(0.430)              | 0.276<br>(0.220)          |
| Constant                                                      | -6.315***<br>(2.442)      | -5.052***<br>(1.332)               | -9.868**<br>(4.036)            | -2.381**<br>(0.936)       |
| N=                                                            | 541                       | 594                                | 594                            | 594                       |
| Pseudo R <sup>2</sup>                                         | 0.187                     | 0.109                              | 0.177                          | 0.094                     |
| Log Likelihood                                                | -159.980                  | -288.113                           | -163.606                       | -361.804                  |

<sup>1</sup> A transformed variable for age using Box-Tidwell to prevent specification error are used in these models and their results reported here.

<sup>2</sup> Transformed variables for education and religious service attendance using Box-Tidwell to prevent specification error are used in these models and their results reported here.

Source: 2008 ANES Time Series Study. Democrats of all other racial, ethnic and gender groups are the baseline comparison in these models.

\* $p < .10$  \*\* $p < .05$  \*\*\* $p < .01$

#### H. Effect of Obama's 2012 Campaign on African American Political Behavior

| Variables                      | Donated Money <sup>3</sup> | Sign/Button/<br>Sticker | Attended Rally      | Political Talk       |
|--------------------------------|----------------------------|-------------------------|---------------------|----------------------|
| Vote for Obama                 | 0.350<br>(0.718)           | 0.476<br>(0.575)        | 0.036<br>(0.797)    | 0.345<br>(0.458)     |
| Racial identification          | 0.619<br>(0.512)           | 0.128<br>(0.389)        | -0.122<br>(0.620)   | 0.567<br>(0.344)     |
| Female                         | 0.147<br>(0.460)           | 0.534<br>(0.396)        | -0.008<br>(0.624)   | 0.127<br>(0.333)     |
| Age                            | 0.044**<br>(0.017)         | 0.024*<br>(0.013)       | 0.005<br>(0.021)    | 0.024**<br>(0.012)   |
| South                          | 0.132<br>(0.463)           | -0.563<br>(0.376)       | -0.088<br>(0.639)   | -0.150<br>(0.340)    |
| Income                         | 0.029<br>(0.030)           | -0.016<br>(0.026)       | -0.065<br>(0.043)   | -0.056**<br>(0.023)  |
| Education                      | 0.418*<br>(0.215)          | 0.183<br>(0.174)        | 0.797***<br>(0.298) | 0.260*<br>(0.155)    |
| Religious Service (attendance) | -0.162<br>(0.149)          | 0.059<br>(0.119)        | -0.035<br>(0.191)   | 0.124<br>(0.103)     |
| Ideology                       | 0.031<br>(0.179)           | 0.052<br>(0.142)        | 0.086<br>(0.223)    | 0.140<br>(0.123)     |
| Internal Efficacy              | 0.115<br>(0.219)           | 0.130<br>(0.182)        | 0.164<br>(0.284)    | 0.057<br>(0.157)     |
| External Efficacy              | -0.256<br>(0.239)          | -0.042<br>(0.194)       | -0.334<br>(0.312)   | -0.035<br>(0.172)    |
| Habitual Voter                 | -0.074<br>(0.888)          | 0.237<br>(0.655)        | -0.663<br>(0.837)   | 0.355<br>(0.533)     |
| Constant                       | -5.885***<br>(1.575)       | -3.949***<br>(1.193)    | -4.036**<br>(1.881) | -3.462***<br>(1.003) |
| N=                             | 194                        | 194                     | 194                 | 194                  |
| Pseudo R <sup>2</sup>          | 0.125                      | 0.069                   | 0.104               | 0.085                |
| Log Likelihood                 | -70.056                    | -97.780                 | -45.075             | -119.607             |

Source: 2012 ANES Time Series Study. These models are run using only African Americans sampled who were *not* contacted by the Democratic Party. \* $p < .10$  \*\* $p < .05$  \*\*\* $p < .01$

<sup>3</sup> Further testing demonstrated that women and men of the civil rights generation were significantly more likely than any other African Americans to have donated money in the 2012 presidential campaign.
